# Supplementary material for: Radiation Versus Immune Checkpoint Inhibitor Associated Pneumonitis: Distinct Radiologic Morphologies
Source: PubMed Central journal article supplement — Oncologist. 2021 Aug 4;26(10):e1822–32. doi: 10.1002/onco.13900 (PMC8488797; doi:10.1002/onco.13900), 2021-08-04
Supplement: ONCO-26-e1822-s001.pdf [file ONCO-26-e1822-s001.pdf]

Supplemental Tables for:  
Radiation versus Immune Checkpoint Inhibitor Associated Pneumonitis: Distinct Radiologic Morphologies  
Khinh Ranh Voong et al.

**Supplementary Table 1. CT Scan Parameters (Median [Range])**

|                      | <b>Median [Range]</b>         |
|----------------------|-------------------------------|
| CT Manufacturer      | GE, Philips, Siemens, Toshiba |
| Tube Voltage (kVp)   | 120 [100-140]                 |
| Tube Current (mA)    | 435 [78-1570]                 |
| Pixel Size (mm)      | 0.6777 [0.5030-1.5234]        |
| Slice Thickness (mm) | 3 [1-5]                       |

**Supplementary Table 2. Radiomic Features Extracted from Each CT Set**

|                                               |                                        |
|-----------------------------------------------|----------------------------------------|
| <b>First Order</b>                            | 10th Percentile                        |
|                                               | 90th Percentile                        |
|                                               | Energy                                 |
|                                               | Entropy                                |
|                                               | Interquartile Range                    |
|                                               | Kurtosis                               |
|                                               | Maximum                                |
|                                               | Mean Absolute Deviation                |
|                                               | Mean                                   |
|                                               | Median                                 |
|                                               | Minimum                                |
|                                               | Range                                  |
|                                               | Robust Mean Absolute Deviation         |
|                                               | Root Mean Squared                      |
|                                               | Skewness                               |
|                                               | Total Energy                           |
|                                               | Uniformity                             |
| Variance                                      |                                        |
| <b>Gray Level Co-occurrence Matrix (GLCM)</b> | Autocorrelation                        |
|                                               | Cluster Prominence                     |
|                                               | Cluster Shade                          |
|                                               | Cluster Tendency                       |
|                                               | Contrast                               |
|                                               | Correlation                            |
|                                               | Difference Average                     |
|                                               | Difference Entropy                     |
|                                               | Difference Variance                    |
|                                               | Inverse Difference                     |
|                                               | Inverse Difference Moment              |
|                                               | Inverse Difference Moment Normalized   |
|                                               | Inverse Difference Normalized          |
|                                               | Informational Measure of Correlation 1 |
|                                               | Informational Measure of Correlation 2 |
|                                               | Inverse Variance                       |
|                                               | Joint Average                          |
|                                               | Joint Energy                           |
|                                               | Joint Entropy                          |
|                                               | Maximal Correlation Coefficient        |
| Maximum Probability                           |                                        |
| Sum Average                                   |                                        |

|                                             |                                           |
|---------------------------------------------|-------------------------------------------|
|                                             | Sum Entropy                               |
|                                             | Sum Squares                               |
| <b>Gray Level Dependence Matrix (GLDM)</b>  | Dependence Entropy                        |
|                                             | Dependence Non-Uniformity                 |
|                                             | Dependence Non-Uniformity Normalized      |
|                                             | Dependence Variance                       |
|                                             | Gray Level Non-Uniformity                 |
|                                             | Gray Level Variance                       |
|                                             | High Gray Level Emphasis                  |
|                                             | Large Dependence Emphasis                 |
|                                             | Large Dependence High Gray Level Emphasis |
|                                             | Large Dependence Low Gray Level Emphasis  |
|                                             | Low Gray Level Emphasis                   |
|                                             | Small Dependence Emphasis                 |
|                                             | Small Dependence High Gray Level Emphasis |
|                                             | Small Dependence Low Gray Level Emphasis  |
| <b>Gray Level Run Length Matrix (GLRLM)</b> | Gray Level Non-Uniformity                 |
|                                             | Gray Level Non-Uniformity Normalized      |
|                                             | Gray Level Variance                       |
|                                             | High Gray Level Run Emphasis              |
|                                             | Long Run Emphasis                         |
|                                             | Long Run High Gray Level Emphasis         |
|                                             | Long Run Low Gray Level Emphasis          |
|                                             | Low Gray Level Run Emphasis               |
|                                             | Run Entropy                               |
|                                             | Run Length Non-Uniformity                 |
|                                             | Run Length Non-Uniformity Normalized      |
|                                             | Run Percentage                            |
|                                             | Run Variance                              |
|                                             | Short Run Emphasis                        |
|                                             | Short Run High Gray Level Emphasis        |
|                                             | Short Run Low Gray Level Emphasis         |
| <b>Gray Level Size Zone Matrix (GLSZM)</b>  | Gray Level Non-Uniformity                 |
|                                             | Gray Level Non-Uniformity Normalized      |
|                                             | Gray Level Variance                       |
|                                             | High Gray Level Zone Emphasis             |
|                                             | Large Area Emphasis                       |
|                                             | Large Area High Gray Level Emphasis       |
|                                             | Large Area Low Gray Level Emphasis        |
|                                             | Low Gray Level Zone Emphasis              |
|                                             | Size Zone Non-Uniformity                  |

---

|                                                                    |                                     |
|--------------------------------------------------------------------|-------------------------------------|
|                                                                    | Size Zone Non-Uniformity Normalized |
|                                                                    | Small Area Emphasis                 |
|                                                                    | Small Area High Gray Level Emphasis |
|                                                                    | Small Area Low Gray Level Emphasis  |
|                                                                    | Zone Entropy                        |
|                                                                    | Zone Percentage                     |
|                                                                    | Zone Variance                       |
| <b>Neighboring<br/>Gray Tone<br/>Difference<br/>Matrix (NGTDM)</b> | Busyness                            |
|                                                                    | Coarseness                          |
|                                                                    | Complexity                          |
|                                                                    | Contrast                            |
|                                                                    | Strength                            |

---

**Supplementary Table 3. Select Radiomic Features of RT vs ICI-Pneumonitis (Mean ± Standard Deviation)**

|                                                               | RT Alone         | ICI Alone        | P value <sup>a</sup><br>(RT vs ICI) | RT+ICI           | P value <sup>a</sup><br>(RT+ICI vs RT Alone) | P value <sup>a</sup><br>(RT+ICI vs ICI Alone) |
|---------------------------------------------------------------|------------------|------------------|-------------------------------------|------------------|----------------------------------------------|-----------------------------------------------|
| <b>N</b>                                                      | 29               | 23               |                                     | 30               |                                              |                                               |
| <b>CL Post NGTDM Contrast</b>                                 | 0.07 ± 0.04      | 0.10 ± 0.06      | 0.03                                | 0.07 ± 0.04      | 0.79                                         | 0.05                                          |
| <b>CL Post NGTDM Strength</b>                                 | 0.08 ± 0.05      | 0.05 ± 0.03      | 0.04                                | 0.05 ± 0.02      | 0.03                                         | 0.98                                          |
| <b>IL Delta FO Kurtosis</b>                                   | -8.1 ± 5.8       | -2.9 ± 3.7       | <0.001                              | -5.3 ± 16.3      | 0.39                                         | 0.48                                          |
| <b>IL Delta FO Total Energy</b>                               | -4.8E11 ± 4.3E11 | -1.3E11 ± 3.3E11 | 0.002                               | -2.5E11 ± 4.6E11 | 0.05                                         | 0.28                                          |
| <b>IL Delta GLCM Cluster Shade</b>                            | 4.5E3 ± 7.3E3    | -2.0E3 ± 8.5E3   | 0.004                               | 6.6E3 ± 8.3E3    | 0.32                                         | 0.001                                         |
| <b>IL Delta GLDM Dependence Variance</b>                      | -3.0 ± 6.7       | 0.6 ± 5.0        | 0.04                                | -0.2 ± 6.4       | 0.10                                         | 0.62                                          |
| <b>IL Delta GLDM Large Dependence Low Gray Level Emphasis</b> | -0.6 ± 1.8       | 0.4 ± 1.4        | 0.04                                | 0.7 ± 1.8        | 0.006                                        | 0.42                                          |

<sup>a</sup> P values from two-sided T tests

**Abbreviations:** CL, contralateral lung (relative to the primary tumor); Delta, delta radiomic features; FO, First Order features; GLCM, Gray Level Co-occurrence Matrix; GLDM, Gray Level Dependence Matrix; IL, ipsilateral lung (relative to the primary tumor); NGTDM, Neighboring Gray Tone Difference Matrix; Post, post-treatment.
