# Supplementary material for: Radiation Versus Immune Checkpoint Inhibitor Associated Pneumonitis: Distinct Radiologic Morphologies
Source: PubMed Central journal article supplement — Oncologist. 2021 Aug 4;26(10):e1822–32. doi: 10.1002/onco.13900 (PMC8488797; doi:10.1002/onco.13900), 2021-08-04

Supplemental Figure for:  
Radiation versus Immune Checkpoint Inhibitor Associated Pneumonitis: Distinct Radiologic Morphologies  
Khinh Ranh Voong et al.

**Supplementary Figure 1.** RT vs. ICI-pneumonitis have different NGTDM Contrast values. Magnified view of the lung contralateral to the primary tumor on CT scans at the time of pneumonitis. Panels A-D correspond to Figure 1A-1D, respectively. Neighborhood gray tone difference matrix (NGTDM) Contrast values: A, 0.06; B, 0.21; C, 0.04; D, 0.16.

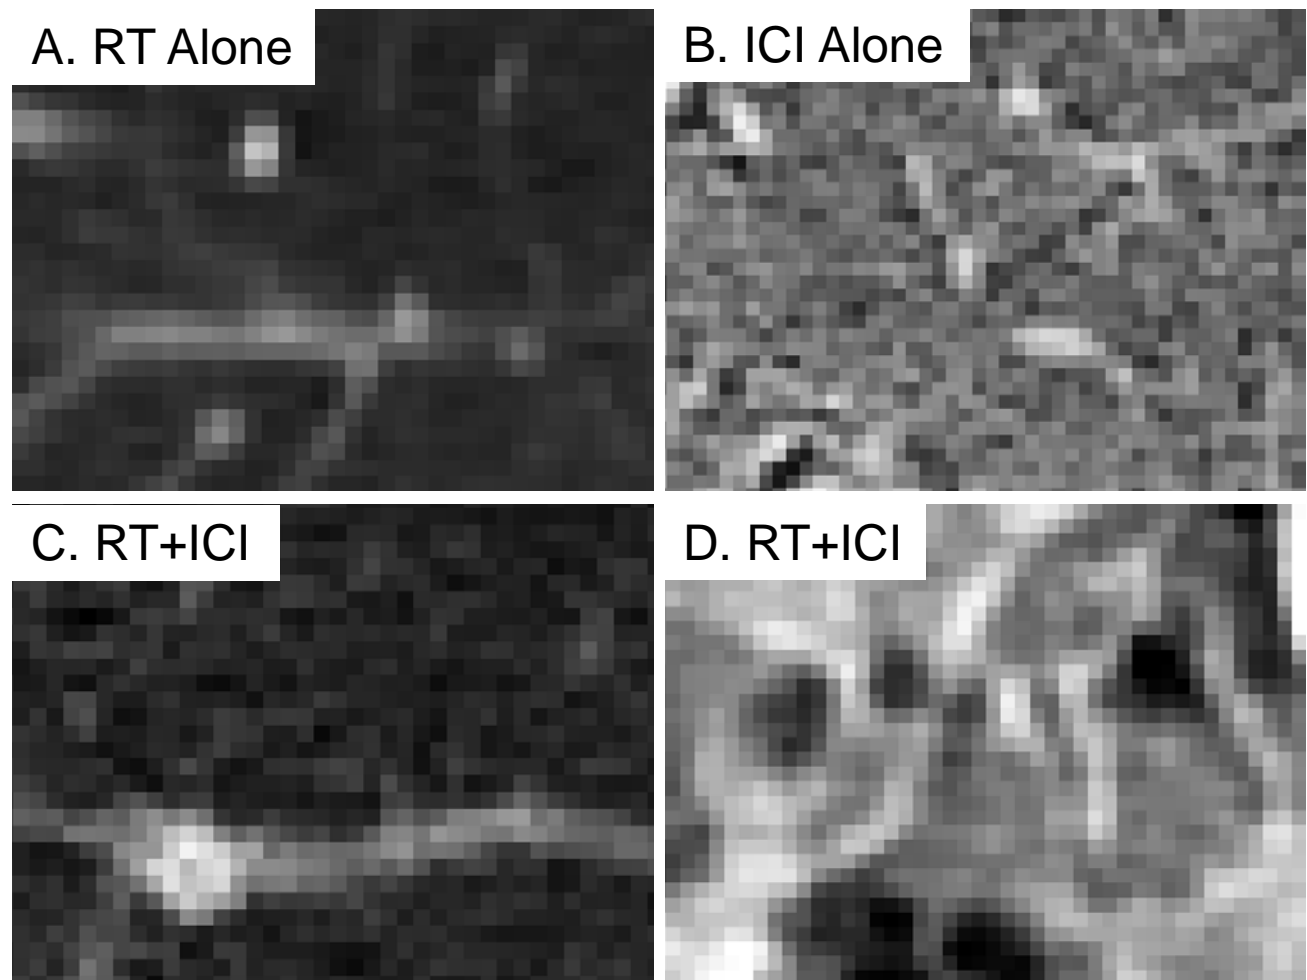

Supplement: ONCO-26-e1822-s002.pdf [file ONCO-26-e1822-s002.pdf]
